# Supplementary material
Source: PubMed Central journal article supplement (PMC6532030)
Supplement: AEM.00371-19-s0001.pdf [file AEM.00371-19-s0001.pdf]

*Supplemental Materials*

**Microcin PDI Inhibits Antibiotic-Resistant Strains of *Escherichia coli* and *Shigella*  
Through a Mechanism of Membrane Disruption and Protection by Homotrimer Self-  
Immunity**

Shao-Yeh Lu<sup>a,b</sup>, Telmo Graça<sup>b</sup>, Johannetsy J. Avillan<sup>a</sup>, Zhe Zhao<sup>a,c</sup>, and Douglas R. Call<sup>a, b#</sup>

<sup>a</sup>Paul G. Allen School for Global Animal Health, Washington State University, Pullman, WA 99164, USA

<sup>b</sup>Department of Veterinary Microbiology and Pathology, Washington State University, Pullman, WA 99164, USA

<sup>c</sup>College of Oceanography Hohai University, Nanjing 210098, PR China

Running head: Microcin PDI inhibits antibiotic-resistant bacteria

#Corresponding author:

Douglas R. Call, PhD.

Paul G. Allen School for Global Animal Health

240 SE Ott Road

Pullman, WA 99164-7090

509-335-6313; [drcall@wsu.edu](mailto:drcall@wsu.edu)

# Supplemental Figure

|                 |     |          |        |             |          |         |          |        |         |        |        |       |       |      |      |      |      |       |     |     |   |   |   |    |    |    |    |   |   |   |   |   |   |   |   |   |   |   |   |   |
|-----------------|-----|----------|--------|-------------|----------|---------|----------|--------|---------|--------|--------|-------|-------|------|------|------|------|-------|-----|-----|---|---|---|----|----|----|----|---|---|---|---|---|---|---|---|---|---|---|---|---|
|                 |     |          |        | Loop 1      |          |         |          |        |         |        |        |       |       |      |      |      |      |       |     |     |   |   |   |    |    |    |    |   |   |   |   |   |   |   |   |   |   |   |   |   |
| Ecoli_K12MG1655 | 1   | MMKRNI   | LAVIVP | PALLVAGTANA | AEIYNKDG | NKVDLYG | KAVGLHYF | SKNGEN | SYGGNG  | DMTYAR | LGFKGE | TQINS | DLTGY |      |      |      |      |       |     |     |   |   |   |    |    |    |    |   |   |   |   |   |   |   |   |   |   |   |   |   |
| Ecoli_BW25113   | 1   | MMKRNI   | LAVIVP | PALLVAGTANA | AEIYNKDG | NKVDLYG | KAVGLHYF | SKNGEN | SYGGNG  | DMTYAR | LGFKGE | TQINS | DLTGY |      |      |      |      |       |     |     |   |   |   |    |    |    |    |   |   |   |   |   |   |   |   |   |   |   |   |   |
| Ecoli_25        | 1   | MMKRNI   | LAVIVP | PALLVAGTANA | AEIYNKDG | NKVDLYG | KAVGLHYF | SKNGEN | SYGGNG  | DMTYAR | LGFKGE | TQINS | DLTGY |      |      |      |      |       |     |     |   |   |   |    |    |    |    |   |   |   |   |   |   |   |   |   |   |   |   |   |
| Ecoli_AR0346    | 1   | MMKRNI   | LAVIVP | PALLVAGTANA | AEIYNKDG | NKVDLYG | KAVGLHYF | SKNGEN | SYGGNG  | DMTYAR | LGFKGE | TQINS | DLTGY |      |      |      |      |       |     |     |   |   |   |    |    |    |    |   |   |   |   |   |   |   |   |   |   |   |   |   |
| * Ecoli_AR0349  | 1   | MMKRNI   | LAVIVP | PALLVAGTANA | AEIYNKDG | NKVDLYG | KAVGLHYF | SKNGEN | SYGGNG  | DMTYAR | LGFKGE | TQINS | DLTGY |      |      |      |      |       |     |     |   |   |   |    |    |    |    |   |   |   |   |   |   |   |   |   |   |   |   |   |
| Ecoli_MAD96     | 1   | MMKRNI   | LAVIVP | PALLVAGTANA | AEIYNKDG | NKVDLYG | KAVGLHYF | SKNGEN | SYGGNG  | DMTYAR | LGFKGE | TQINS | DLTGY |      |      |      |      |       |     |     |   |   |   |    |    |    |    |   |   |   |   |   |   |   |   |   |   |   |   |   |
| Sflexneri_2457T | 1   | MMKRNI   | LAVIVP | PALLVAGTANA | AEIYNKDG | NKVDLYG | KAVGLHYF | SKNGEN | SYGGNG  | DMTYAR | LGFKGE | TQINS | DLTGY |      |      |      |      |       |     |     |   |   |   |    |    |    |    |   |   |   |   |   |   |   |   |   |   |   |   |   |
| Ssonnei         | 1   | MMKRNI   | LAVIVP | PALLVAGTANA | AEIYNKDG | NKVDLYG | KAVGLHYF | SKNGEN | SYGGNG  | DMTYAR | LGFKGE | TQINS | DLTGY |      |      |      |      |       |     |     |   |   |   |    |    |    |    |   |   |   |   |   |   |   |   |   |   |   |   |   |
| Sboydii         | 1   | MMKRNI   | LAVIVP | PALLVAGTANA | AEIYNKDG | NKVDLYG | KAVGLHYF | SKNGEN | SYGGNG  | DMTYAR | LGFKGE | TQINS | DLTGY |      |      |      |      |       |     |     |   |   |   |    |    |    |    |   |   |   |   |   |   |   |   |   |   |   |   |   |
| Sdysenteriae    | 1   | MMKRNI   | LAVIVP | PALLVAGTANA | AEIYNKDG | NKVDLYG | KAVGLHYF | SKNGEN | SYGGNG  | DMTYAR | LGFKGE | TQINS | DLTGY |      |      |      |      |       |     |     |   |   |   |    |    |    |    |   |   |   |   |   |   |   |   |   |   |   |   |   |
|                 |     |          |        | Loop 2      |          | Loop 3  |          |        |         |        |        |       |       |      |      |      |      |       |     |     |   |   |   |    |    |    |    |   |   |   |   |   |   |   |   |   |   |   |   |   |
| Ecoli_K12MG1655 | 81  | GQWEYN   | FQGN   | SEGADA      | QGTGNK   | TRLA    | FAGL     | KYADV  | GSFDYGR | NYGV   | VDAL   | GYTD  | MLPE  | FGGD | TAYS | DDFF | VGRV | GGVAT |     |     |   |   |   |    |    |    |    |   |   |   |   |   |   |   |   |   |   |   |   |   |
| Ecoli_BW25113   | 81  | GQWEYN   | FQGN   | SEGADA      | QGTGNK   | TRLA    | FAGL     | KYADV  | GSFDYGR | NYGV   | VDAL   | GYTD  | MLPE  | FGGD | TAYS | DDFF | VGRV | GGVAT |     |     |   |   |   |    |    |    |    |   |   |   |   |   |   |   |   |   |   |   |   |   |
| Ecoli_25        | 81  | GQWEYN   | FQGN   | SEGADA      | QGTGNK   | TRLA    | FAGL     | KYADV  | GSFDYGR | NYGV   | VDAL   | GYTD  | MLPE  | FGGD | TAYS | DDFF | VGRV | GGVAT |     |     |   |   |   |    |    |    |    |   |   |   |   |   |   |   |   |   |   |   |   |   |
| Ecoli_AR0346    | 81  | GQWEYN   | FQGN   | SEGADA      | QGTGNK   | TRLA    | FAGL     | KYADV  | GSFDYGR | NYGV   | VDAL   | GYTD  | MLPE  | FGGD | TAYS | DDFF | VGRV | GGVAT |     |     |   |   |   |    |    |    |    |   |   |   |   |   |   |   |   |   |   |   |   |   |
| * Ecoli_AR0349  | 81  | GQWEYN   | FQGN   | SEGADA      | QGTGNK   | TRLA    | FAGL     | KYADV  | GSFDYGR | NYGV   | VDAL   | GYTD  | MLPE  | FGGD | TAYS | DDFF | VGRV | GGVAT |     |     |   |   |   |    |    |    |    |   |   |   |   |   |   |   |   |   |   |   |   |   |
| Ecoli_MAD96     | 81  | GQWEYN   | FQGN   | SEGADA      | QGTGNK   | TRLA    | FAGL     | KYADV  | GSFDYGR | NYGV   | VDAL   | GYTD  | MLPE  | FGGD | TAYS | DDFF | VGRV | GGVAT |     |     |   |   |   |    |    |    |    |   |   |   |   |   |   |   |   |   |   |   |   |   |
| Sflexneri_2457T | 81  | GQWEYN   | FQGN   | SEGADA      | QGTGNK   | TRLA    | FAGL     | KYADV  | GSFDYGR | NYGV   | VDAL   | GYTD  | MLPE  | FGGD | TAYS | DDFF | VGRV | GGVAT |     |     |   |   |   |    |    |    |    |   |   |   |   |   |   |   |   |   |   |   |   |   |
| Ssonnei         | 81  | GQWEYN   | FQGN   | SEGADA      | QGTGNK   | TRLA    | FAGL     | KYADV  | GSFDYGR | NYGV   | VDAL   | GYTD  | MLPE  | FGGD | TAYS | DDFF | VGRV | GGVAT |     |     |   |   |   |    |    |    |    |   |   |   |   |   |   |   |   |   |   |   |   |   |
| Sboydii         | 81  | GQWEYN   | FQGN   | SEGADA      | QGTGNK   | TRLA    | FAGL     | KYADV  | GSFDYGR | NYGV   | VDAL   | GYTD  | MLPE  | FGGD | TAYS | DDFF | VGRV | GGVAT |     |     |   |   |   |    |    |    |    |   |   |   |   |   |   |   |   |   |   |   |   |   |
| Sdysenteriae    | 81  | GQWEYN   | FQGN   | SEGADA      | QGTGNK   | TRLA    | FAGL     | KYADV  | GSFDYGR | NYGV   | VDAL   | GYTD  | MLPE  | FGGD | TAYS | DDFF | VGRV | GGVAT |     |     |   |   |   |    |    |    |    |   |   |   |   |   |   |   |   |   |   |   |   |   |
|                 |     |          |        | Loop 4      |          | Loop 5  |          |        |         |        |        |       |       |      |      |      |      |       |     |     |   |   |   |    |    |    |    |   |   |   |   |   |   |   |   |   |   |   |   |   |
| Ecoli_K12MG1655 | 161 | YRNSNF   | FGLV   | DGLN        | FVQY     | LGKNER  | -TARRS   | NGD    | GVGGS   | ISYEV  | EGFG   | I     | V     | G    | A    | Y    | G    | A     | A   | R   | T | N | L | O  | E  | A  | O  | P | L | G | N | G | K | K | A | E | Q | W | A | T |
| Ecoli_BW25113   | 161 | YRNSNF   | FGLV   | DGLN        | FVQY     | LGKNER  | -TARRS   | NGD    | GVGGS   | ISYEV  | EGFG   | I     | V     | G    | A    | Y    | G    | A     | A   | R   | T | N | L | O  | E  | A  | O  | P | L | G | N | G | K | K | A | E | Q | W | A | T |
| Ecoli_25        | 161 | YRNSNF   | FGLV   | DGLN        | FVQY     | LGKNER  | -TARRS   | NGD    | GVGGS   | ISYEV  | EGFG   | I     | V     | G    | A    | Y    | G    | A     | A   | R   | T | N | L | O  | E  | A  | O  | P | L | G | N | G | K | K | A | E | Q | W | A | T |
| Ecoli_AR0346    | 161 | YRNSNF   | FGLV   | DGLN        | FVQY     | LGKNER  | -TARRS   | NGD    | GVGGS   | ISYEV  | EGFG   | I     | V     | G    | A    | Y    | G    | A     | A   | R   | T | N | L | O  | E  | A  | O  | P | L | G | N | G | K | K | A | E | Q | W | A | T |
| * Ecoli_AR0349  | 161 | YRNSNF   | FGLV   | DGLN        | FVQY     | LGKNER  | -TARRS   | NGD    | GVGGS   | ISYEV  | EGFG   | I     | V     | G    | A    | Y    | G    | A     | A   | R   | T | N | L | O  | E  | A  | O  | P | L | G | N | G | K | K | A | E | Q | W | A | T |
| Ecoli_MAD96     | 161 | YRNSNF   | FGLV   | DGLN        | FVQY     | LGKNER  | -TARRS   | NGD    | GVGGS   | ISYEV  | EGFG   | I     | V     | G    | A    | Y    | G    | A     | A   | R   | T | N | L | O  | E  | A  | O  | P | L | G | N | G | K | K | A | E | Q | W | A | T |
| Sflexneri_2457T | 161 | YRNSNF   | FGLV   | DGLN        | FVQY     | LGKNER  | -TARRS   | NGD    | GVGGS   | ISYEV  | EGFG   | I     | V     | G    | A    | Y    | G    | A     | A   | R   | T | N | L | O  | E  | A  | O  | P | L | G | N | G | K | K | A | E | Q | W | A | T |
| Ssonnei         | 161 | YRNSNF   | FGLV   | DGLN        | FVQY     | LGKNER  | -TARRS   | NGD    | GVGGS   | ISYEV  | EGFG   | I     | V     | G    | A    | Y    | G    | A     | A   | R   | T | N | L | O  | E  | A  | O  | P | L | G | N | G | K | K | A | E | Q | W | A | T |
| Sboydii         | 161 | YRNSNF   | FGLV   | DGLN        | FVQY     | LGKNER  | -TARRS   | NGD    | GVGGS   | ISYEV  | EGFG   | I     | V     | G    | A    | Y    | G    | A     | A   | R   | T | N | L | O  | E  | A  | O  | P | L | G | N | G | K | K | A | E | Q | W | A | T |
| Sdysenteriae    | 161 | YRNSNF   | FGLV   | DGLN        | FVQY     | LGKNER  | -TARRS   | NGD    | GVGGS   | ISYEV  | EGFG   | I     | V     | G    | A    | Y    | G    | A     | A   | R   | T | N | L | O  | E  | A  | O  | P | L | G | N | G | K | K | A | E | Q | W | A | T |
|                 |     |          |        | Loop 6      |          | Loop 7  |          |        |         |        |        |       |       |      |      |      |      |       |     |     |   |   |   |    |    |    |    |   |   |   |   |   |   |   |   |   |   |   |   |   |
| Ecoli_K12MG1655 | 240 | LKYDANNI | YLAANY | GETR        | NATPI    | TNKF    | TNTS     | GFANK  | TQD     | VLLVA  | QYQ    | DFGL  | RPSI  | AYT  | KS   | K    | A    | K     | D   | VEG | I | G | D | V  | DL | V  | NY | F | E | V |   |   |   |   |   |   |   |   |   |   |
| Ecoli_BW25113   | 240 | LKYDANNI | YLAANY | GETR        | NATPI    | TNKF    | TNTS     | GFANK  | TQD     | VLLVA  | QYQ    | DFGL  | RPSI  | AYT  | KS   | K    | A    | K     | D   | VEG | I | G | D | V  | DL | V  | NY | F | E | V |   |   |   |   |   |   |   |   |   |   |
| Ecoli_25        | 240 | LKYDANNI | YLAANY | GETR        | NATPI    | TNKF    | TNTS     | GFANK  | TQD     | VLLVA  | QYQ    | DFGL  | RPSI  | AYT  | KS   | K    | A    | K     | D   | VEG | I | G | D | V  | DL | V  | NY | F | E | V |   |   |   |   |   |   |   |   |   |   |
| Ecoli_AR0346    | 240 | LKYDANNI | YLAANY | GETR        | NATPI    | TNKF    | TNTS     | GFANK  | TQD     | VLLVA  | QYQ    | DFGL  | RPSI  | AYT  | KS   | K    | A    | K     | D   | VEG | I | G | D | V  | DL | V  | NY | F | E | V |   |   |   |   |   |   |   |   |   |   |
| * Ecoli_AR0349  | 241 | LKYDANNI | YLAANY | GETR        | NATPIE   | ----    | GFANK    | TQD    | VLLVA   | QYQ    | DFGL   | RPSI  | AYT   | KS   | K    | A    | K    | D     | VEG | I   | G | D | V | DL | V  | NY | F  | E | V |   |   |   |   |   |   |   |   |   |   |   |
| Ecoli_MAD96     | 240 | LKYDANNI | YLAANY | GETR        | NATPI    | TNKF    | TNTS     | GFANK  | TQD     | VLLVA  | QYQ    | DFGL  | RPSI  | AYT  | KS   | K    | A    | K     | D   | VEG | I | G | D | V  | DL | V  | NY | F | E | V |   |   |   |   |   |   |   |   |   |   |
| Sflexneri_2457T | 240 | LKYDANNI | YLAANY | GETR        | NATPI    | TNKF    | TNTS     | GFANK  | TQD     | VLLVA  | QYQ    | DFGL  | RPSI  | AYT  | KS   | K    | A    | K     | D   | VEG | I | G | D | V  | DL | V  | NY | F | E | V |   |   |   |   |   |   |   |   |   |   |
| Ssonnei         | 240 | LKYDANNI | YLAANY | GETR        | NATPI    | TNKF    | TNTS     | GFANK  | TQD     | VLLVA  | QYQ    | DFGL  | RPSI  | AYT  | KS   | K    | A    | K     | D   | VEG | I | G | D | V  | DL | V  | NY | F | E | V |   |   |   |   |   |   |   |   |   |   |
| Sboydii         | 240 | LKYDANNI | YLAANY | GETR        | NATPI    | TNKF    | TNTS     | GFANK  | TQD     | VLLVA  | QYQ    | DFGL  | RPSI  | AYT  | KS   | K    | A    | K     | D   | VEG | I | G | D | V  | DL | V  | NY | F | E | V |   |   |   |   |   |   |   |   |   |   |
| Sdysenteriae    | 240 | LKYDANNI | YLAANY | GETR        | NATPI    | TNKF    | TNTS     | GFANK  | TQD     | VLLVA  | QYQ    | DFGL  | RPSI  | AYT  | KS   | K    | A    | K     | D   | VEG | I | G | D | V  | DL | V  | NY | F | E | V |   |   |   |   |   |   |   |   |   |   |
|                 |     |          |        | Loop 8      |          |         |          |        |         |        |        |       |       |      |      |      |      |       |     |     |   |   |   |    |    |    |    |   |   |   |   |   |   |   |   |   |   |   |   |   |
| Ecoli_K12MG1655 | 320 | GATYYF   | NKNM   | STYVD       | YII      | INQ     | IDS      | DNKL   | GVG     | SDDT   | VAVG   | IVYQ  |       |      |      |      |      |       |     |     |   |   |   |    |    |    |    |   |   |   |   |   |   |   |   |   |   |   |   |   |
| Ecoli_BW25113   | 320 | GATYYF   | NKNM   | STYVD       | YII      | INQ     | IDS      | DNKL   | GVG     | SDDT   | VAVG   | IVYQ  |       |      |      |      |      |       |     |     |   |   |   |    |    |    |    |   |   |   |   |   |   |   |   |   |   |   |   |   |
| Ecoli_25        | 320 | GATYYF   | NKNM   | STYVD       | YII      | INQ     | IDS      | DNKL   | GVG     | SDDT   | VAVG   | IVYQ  |       |      |      |      |      |       |     |     |   |   |   |    |    |    |    |   |   |   |   |   |   |   |   |   |   |   |   |   |
| Ecoli_AR0346    | 320 | GATYYF   | NKNM   | STYVD       | YII      | INQ     | IDS      | DNKL   | GVG     | SDDT   | VAVG   | IVYQ  |       |      |      |      |      |       |     |     |   |   |   |    |    |    |    |   |   |   |   |   |   |   |   |   |   |   |   |   |
| * Ecoli_AR0349  | 315 | GATYYF   | NKNM   | STYVD       | YII      | INQ     | IDS      | DNKL   | GVG     | SDDT   | VAVG   | IVYQ  |       |      |      |      |      |       |     |     |   |   |   |    |    |    |    |   |   |   |   |   |   |   |   |   |   |   |   |   |
| Ecoli_MAD96     | 320 | GATYYF   | NKNM   | STYVD       | YII      | INQ     | IDS      | DNKL   | GVG     | SDDT   | VAVG   | IVYQ  |       |      |      |      |      |       |     |     |   |   |   |    |    |    |    |   |   |   |   |   |   |   |   |   |   |   |   |   |
| Sflexneri_2457T | 320 | GATYYF   | NKNM   | STYVD       | YII      | INQ     | IDS      | DNKL   | GVG     | SDDT   | VAVG   | IVYQ  |       |      |      |      |      |       |     |     |   |   |   |    |    |    |    |   |   |   |   |   |   |   |   |   |   |   |   |   |
| Ssonnei         | 320 | GATYYF   | NKNM   | STYVD       | YII      | INQ     | IDS      | DNKL   | GVG     | SDDT   | VAVG   | IVYQ  |       |      |      |      |      |       |     |     |   |   |   |    |    |    |    |   |   |   |   |   |   |   |   |   |   |   |   |   |
| Sboydii         | 320 | GATYYF   | NKNM   | STYVD       | YII      | INQ     | IDS      | DNKL   | GVG     | SDDT   | VAVG   | IVYQ  |       |      |      |      |      |       |     |     |   |   |   |    |    |    |    |   |   |   |   |   |   |   |   |   |   |   |   |   |
| Sdysenteriae    | 320 | GATYYF   | NKNM   | STYVD       | YII      | INQ     | IDS      | DNKL   | GVG     | SDDT   | VAVG   | IVYQ  |       |      |      |      |      |       |     |     |   |   |   |    |    |    |    |   |   |   |   |   |   |   |   |   |   |   |   |   |

**Supplemental Figure 1. Amino acid sequence alignment of OmpF.** *E. coli*, *Shigella* strains, and MccPDI-resistant bacteria *E. coli* strains OmpF sequences alignment were generated using T-Coffee (1). Parenthetical numbers on the left indicate the amino acid position relative to the N terminus of each OmpF. The black shaded regions indicate completely conserved residues. Grey shaded regions are partially conserved residues with greater than 60% identity, while white regions are not conserved residues. Eight Extracellular loops (Loop 1 – 8) are marked based on *E. coli* OmpF crystal structure (2). *E. coli* K12 MG1655 (NP\_415449), *E. coli* BW25113 (NZ\_CP009273.1), *S. flexneri* 2a 2457T (AE014073.1) and *S. sonnei* 53G (HE616528.1), *S. boydii* CDC 3803-94 (CP001063.1), *S. dysenteriae* Sd197 (NC\_007606.1), and *E. coli* AR0349 (MH665273) which encodes an OmpF differed significantly (\*)

(A)

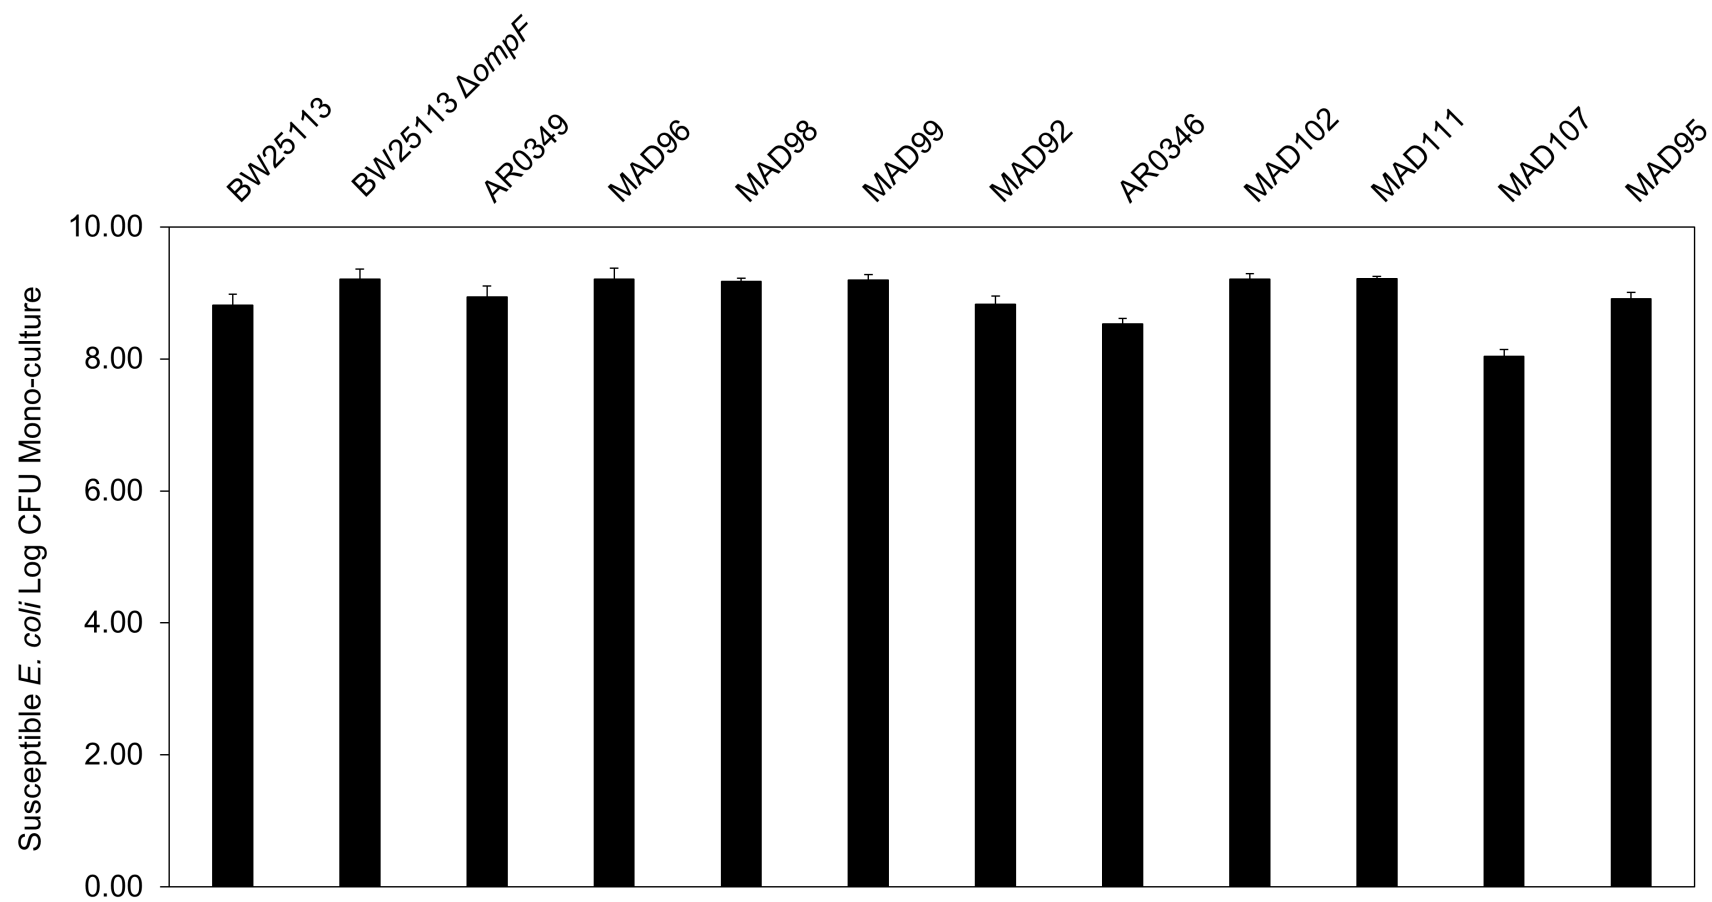

(B)

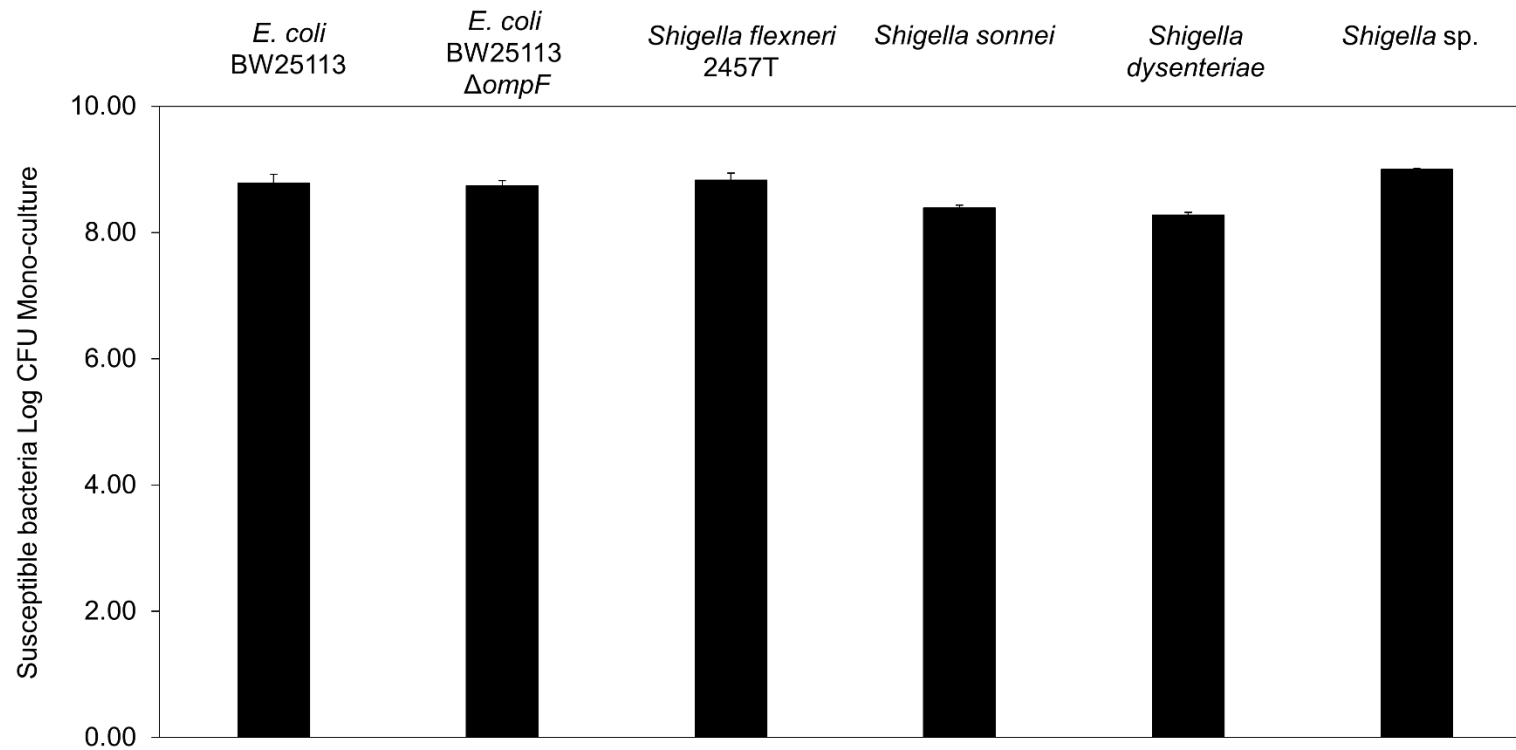

**Supplemental Figure 2. UTI *E. coli* and *Shigella* strains monoculture without MccPDI exposure** (A) Log<sub>10</sub> transformed colony forming units (CFU/mL) for *E. coli* strains after 24 h culture in M9 media without exposure to an MccPDI-producing strain. (B) Log<sub>10</sub> CFU/ml for *Shigella* strains (*flexneri* 24570, *flexneri* 2457T, *sonnei* WRAIR I virulent, *dysenteriae* Newcastle 1934, and Sp.) after 24 h culture in M9 media. Results are expressed as mean and standard error of the mean for three independent replicates.

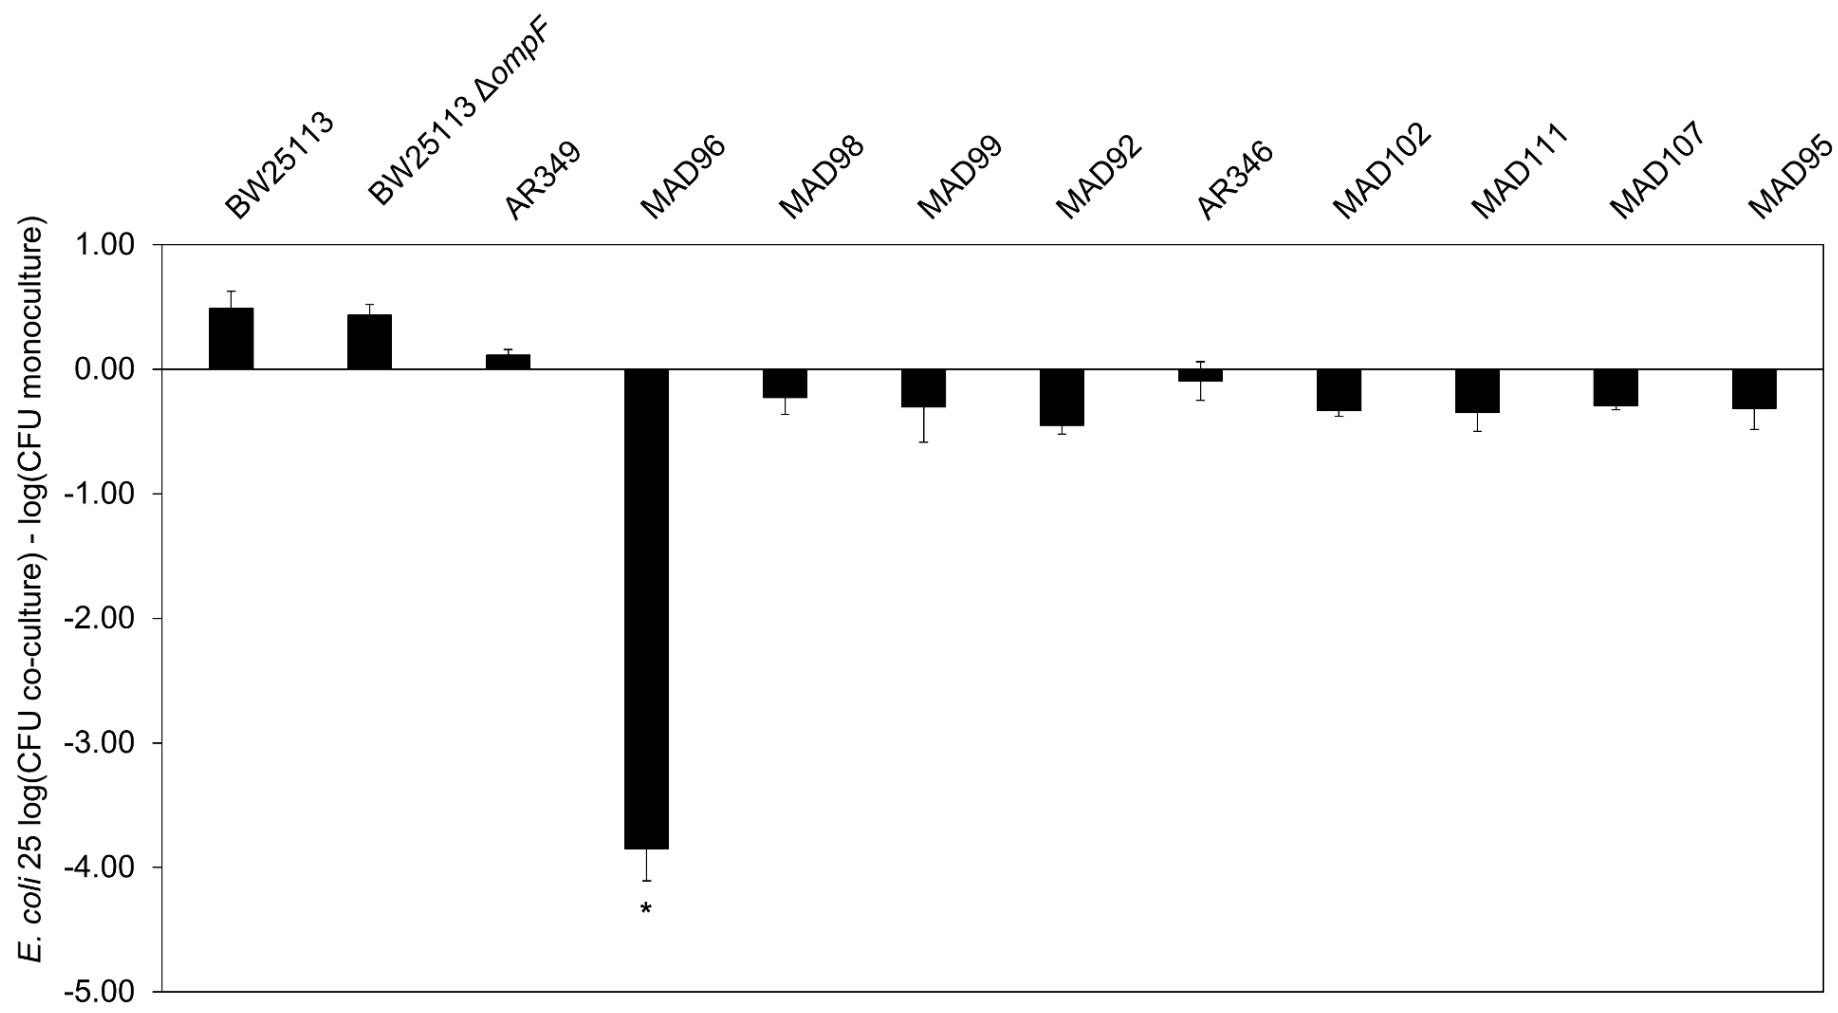

**Supplemental Figure 3. *E. coli* 25 co-culture showed inhibition by MDR UPEC *E. coli* strain MAD 96.** Co-culture competition of MccPDI producer (*E. coli* 25) against potential MccPDI susceptible *E. coli* strains. Results indicated all tested target *E. coli* strains against MccPDI did not inhibit MccPDI producer with the exception of *E. coli* strain MAD 96. Results are expressed as the difference of mean log CFU during co-culture and mono-culture of MccPDI producer strain *E. coli* 25 ( $n = 3$  independent replicates; error bar = SEM).

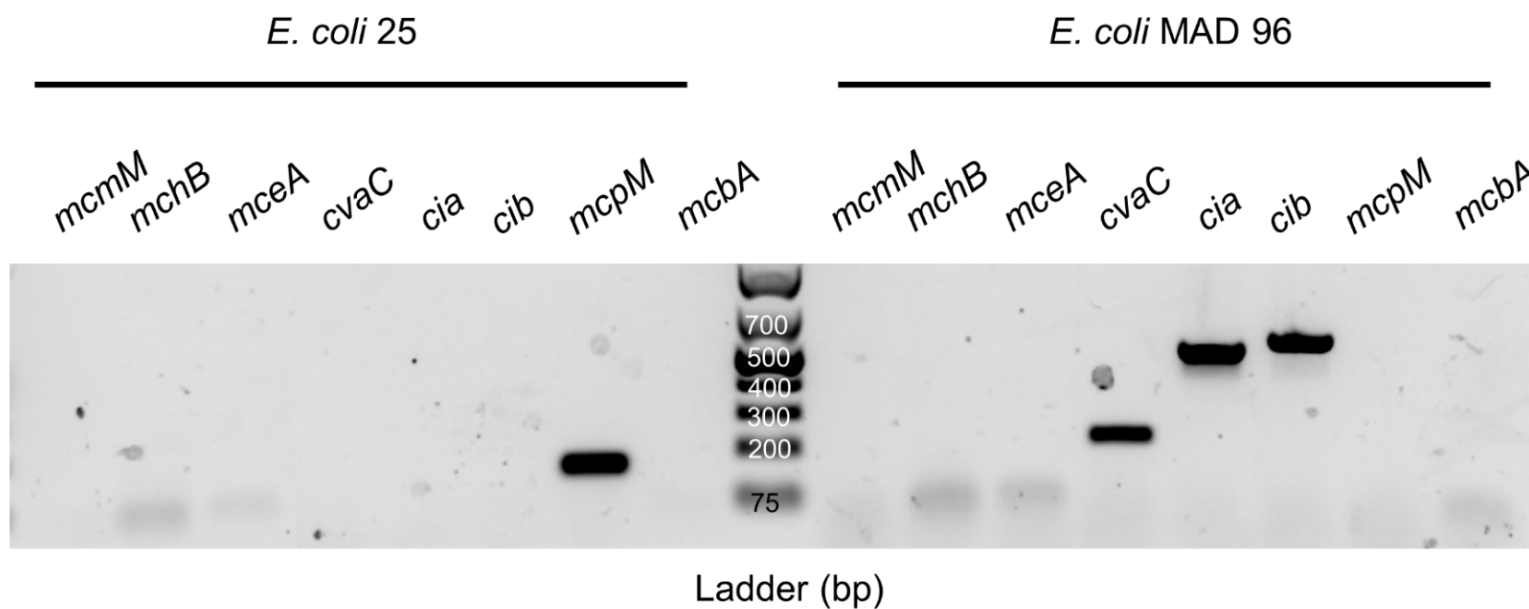

**Supplemental Figure 4. *E. coli* strain MAD 96 PCR analysis tested positive for colicin Ia/Ib and microcin V.** *E. coli* 25 wild-type (*mcpM* positive) serves as a negative control for panels of known microcins and colicins genes. *E. coli* strain MAD 96 was tested positive for colicin Ia/Ib (*cia* and *cib*) and microcin V (*cvaC*). Genes tested consisted of: *mcmM* (microcin M), *mchB* (microcin H47), *mceA* (microcin E492), *cvaC* (microcin V), *cia* (colicin Ia), *cib* (colicin Ib), *mcpM* (microcin PDI), and *mcbA* (microcin B17).



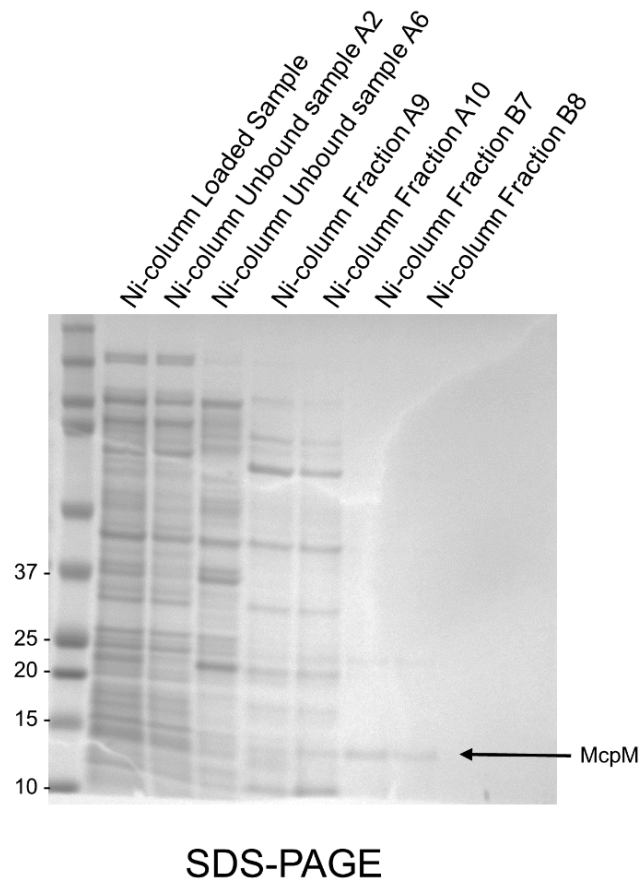

A.

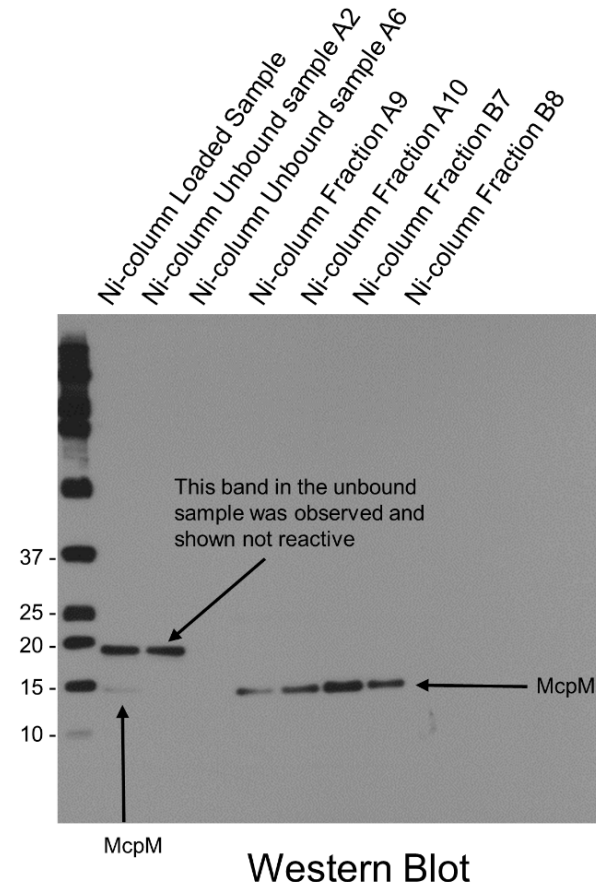

B.

**Supplemental Figure 5. HPLC Purified 6x His-tagged full length McpM.** SDS-PAGE and Western blot were performed to visualize the purified McpM protein. (A) Sample fractions collected from the Ni-column (Unbound samples and fractions) were loaded onto a SDS-PAGE and stained with Coomassie Blue to visualize the presence of McpM 6x-His-tag band. (B). A Western blot was performed with the same samples as in (A) was detected with mouse anti-6xHis-tag and showed the presence of full length McpM peptide.

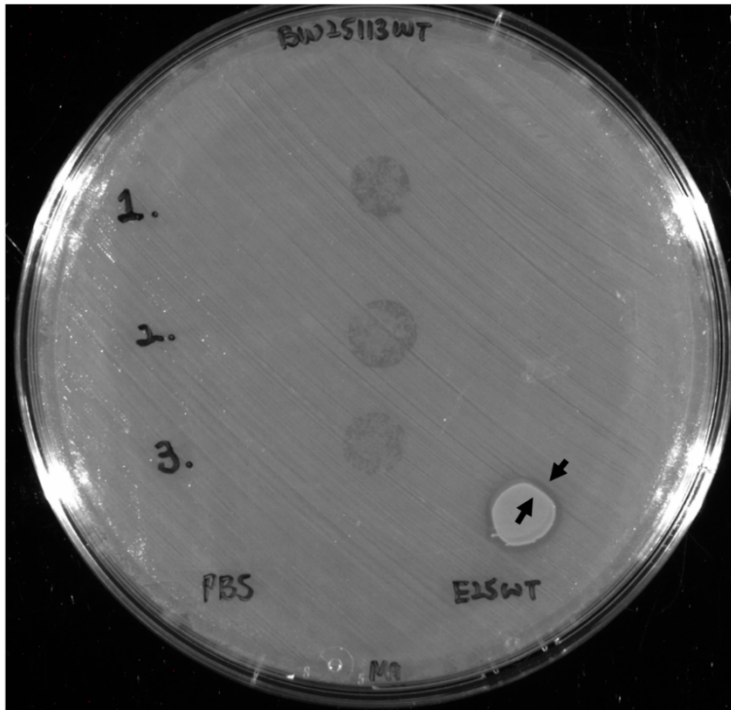

*E. coli* BW25113 wild-type

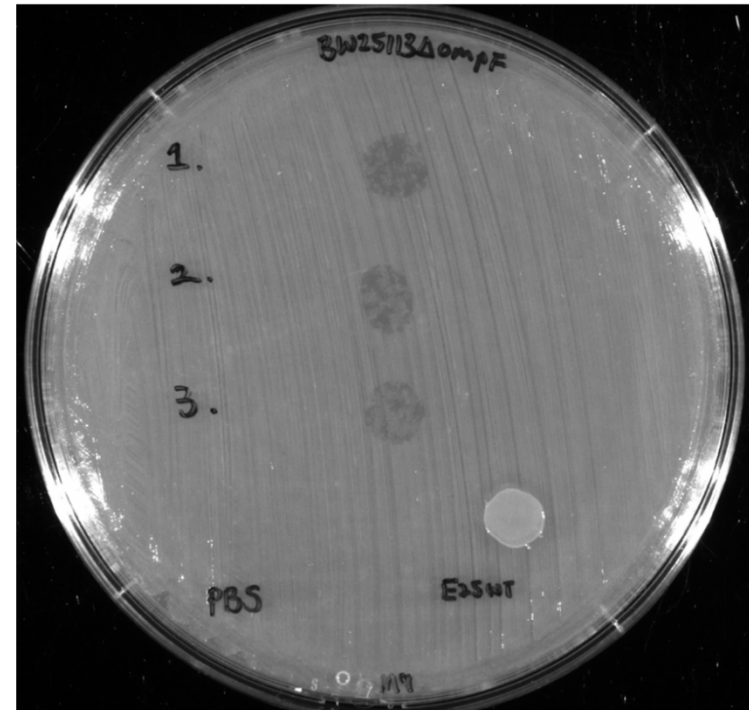

*E. coli* BW25113  $\Delta ompF$

**Supplemental Figure 6. Purified McpM demonstrated inhibition against susceptible *E. coli*.** M9 Agar plate lawn with *E. coli* BW25113 (positive control) or BW25113  $\Delta ompF$  (negative control) was spotted with 5  $\mu$ L of purified McpM with three technical replicates, *E. coli* 25 wild-type (MccPDI wild-type producer) positive control, and 1X sterile PBS (negative control). Plates were air dried and incubated overnight at 37°C. The result demonstrated inhibition against both strains in comparison to the positive control on susceptible strain (BW25113) indicated by zone of inhibition (black arrow).

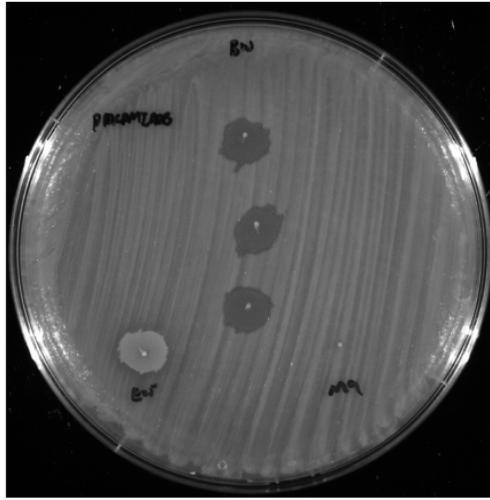

*E. coli* BW25113

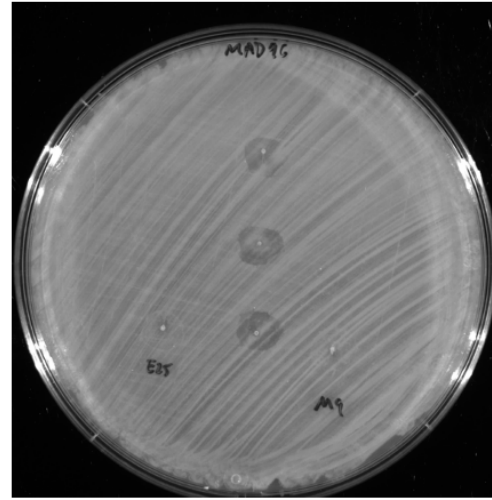

*E. coli* MAD 96

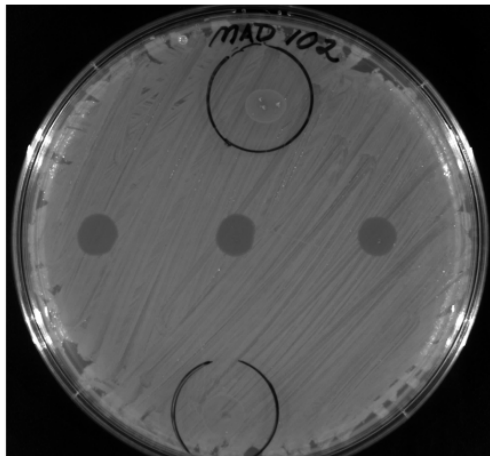

*E. coli* MAD 102

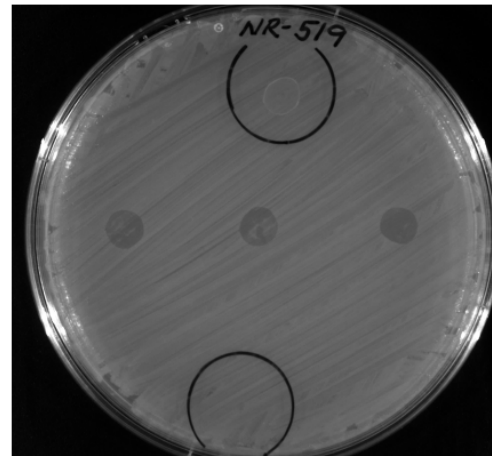

*S. sonnei*

**Supplemental Figure 7. McpM demonstrated inhibition against susceptible *E. coli* MAD96.** LB Agar plate lawn with *E. coli* MAD96 (positive control) and was spotted with 5  $\mu$ L of *E. coli* DH10B/pCR2.1::p<sub>mic-210/0</sub>mcpMIADB with three technical replicates, *E. coli* 25 wild-type (MccPDI producer) negative control, and M9 media (negative control). Plate was air dried and incubated overnight at 37°C. The result demonstrated inhibition against *E. coli* strain BW25113 (positive control), MAD 96, MAD 102 and *Shigella sonnei* in comparison to the negative control strain 25 indicated by zone of inhibition.

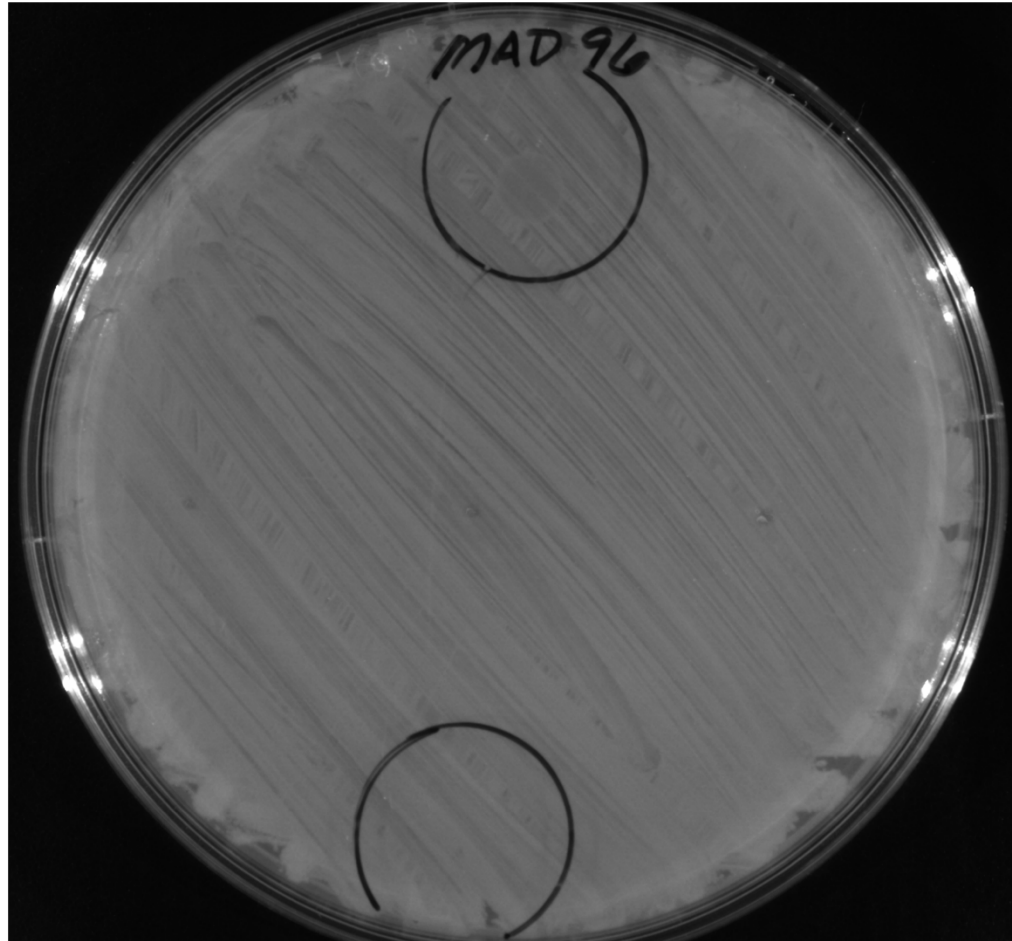

**Supplemental Figure 8. Purified McpM demonstrated inhibition against susceptible *E. coli* MAD96.** LB Agar plate lawn with *E. coli* MAD96 (positive control) and was spotted with 5  $\mu$ L of *E. coli* DH10B/pCR2.1::p<sub>mic-210/0</sub>mcpMIADB with three technical replicates, *E. coli* 25 wild-type (MccPDI producer; upper circle) negative control, and M9 media (negative control; lower circle). Plate was air dried and incubated overnight at 37°C. The result demonstrated inhibition against *E. coli* strain 25.

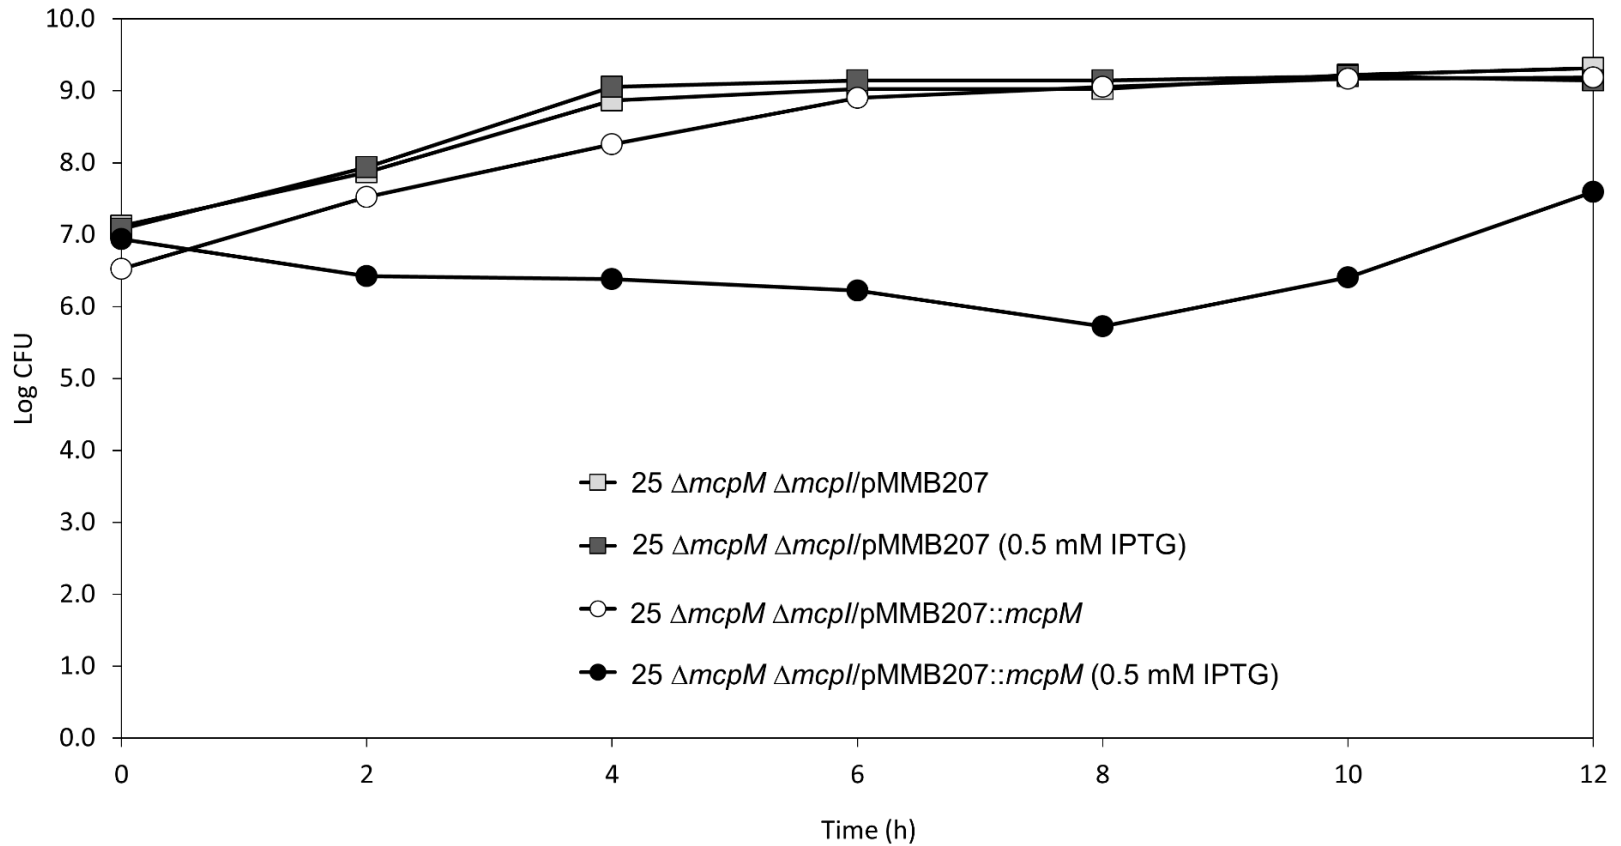

**Supplemental Figure 9. Log colony forming unit (Log CFU) of *E. coli* 25  $\Delta mcpM \Delta mcpI$  complemented with pMMB207 or pMMB207::*mcpM* for 12 h.** Log CFUs were measured for MccPDI producer (*E. coli* 25) with microcin (*mcpM*) and immunity (*mcpI*) gene knocked out complemented with empty vector or *mcpM* complement and induced with or without 0.5 mM IPTG in M9 defined media. Negative control are strains without *mcpM* gene complementation and without 0.5 mM IPTG induction. Bacterial culture taken every two hours for 12 h were plated onto LB agar plate with appropriate antibiotic and CFU numerated.

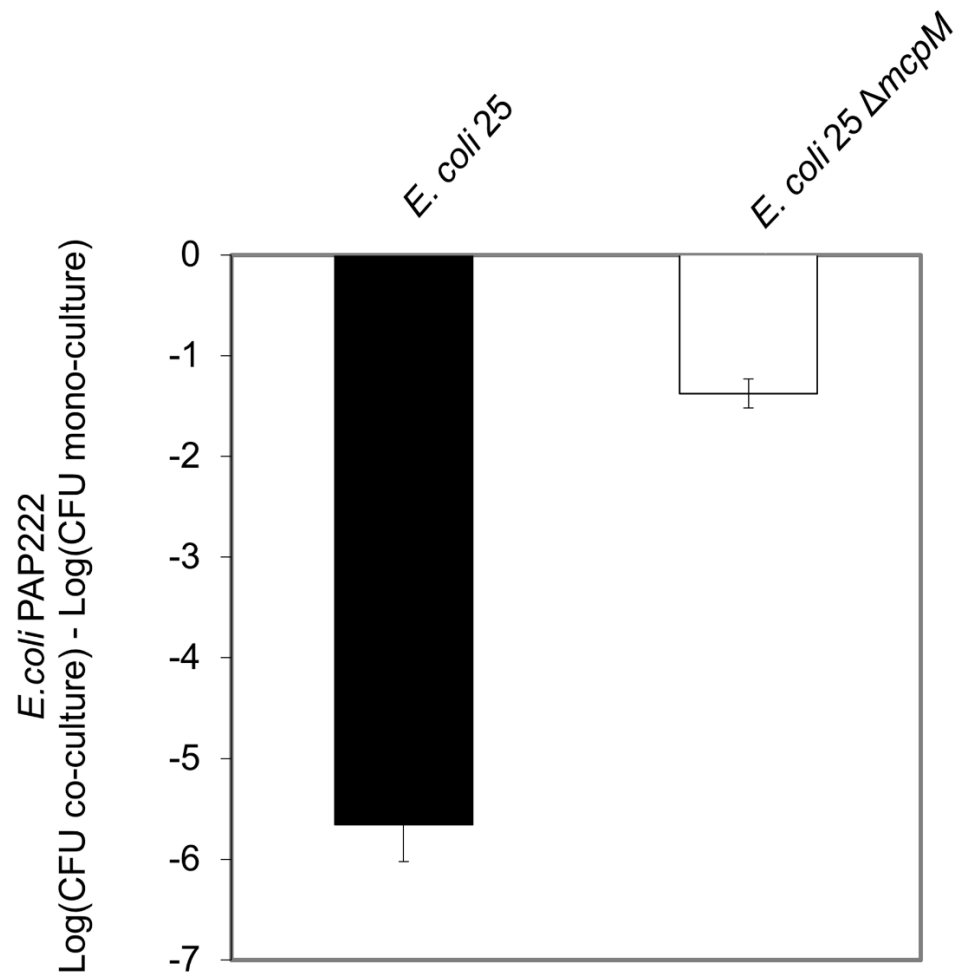

**Supplemental Figure 10. Microcin V (MccV) producer (*E. coli* PAP222) was inhibited by MccPDI producer (*E. coli* 25) in co-culture competition.** Compared to *E. coli* 25  $\Delta$  *mcpM* (white), *E. coli* 25 wild-type was able to inhibit *E. coli* PAP222 (MccV phenotype<sup>+</sup>) strain (black) in M9 media for 24 h. Results are expressed as the difference of mean log CFU during co-culture and mono-culture of the target strain ( $n = 3$  independent replicates; error bar = SEM).

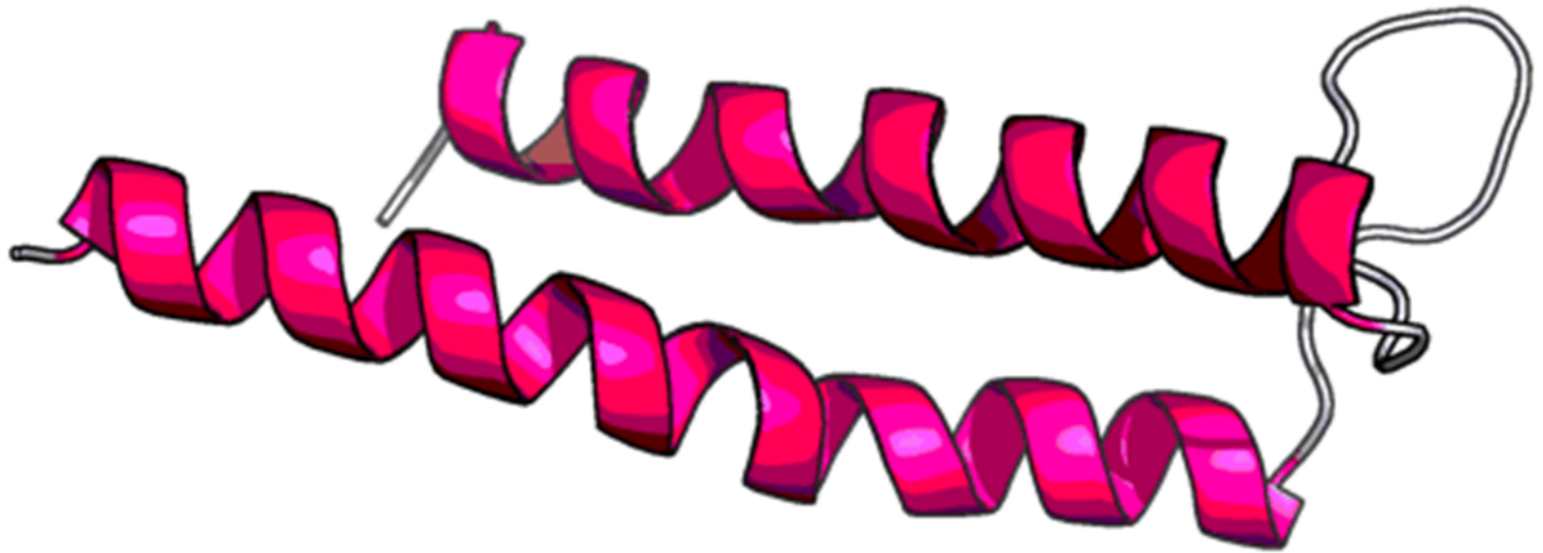

**Supplemental Figure 11. Predicted McpI structure.** Based on the protein structure and function prediction (3), McpI is predicted to be a transmembrane protein that contains two transmembrane domains (4, 5).



## REFERENCES

1. **Notredame C, Higgins DG, Heringa J.** 2000. T-Coffee: A novel method for fast and accurate multiple sequence alignment. *J Mol Biol* **302**:205-217.
2. **Cowan SW, Garavito RM, Jansonius JN, Jenkins JA, Karlsson R, König N, Pai EF, Paupit RA, Rizkallah PJ, Rosenbusch JP, et al.** 1995. The structure of OmpF porin in a tetragonal crystal form. *Structure* **3**:1041-1050.
3. **Kallberg M, Wang H, Wang S, Peng J, Wang Z, Lu H, Xu J.** 2012. Template-based protein structure modeling using the RaptorX web server. *Nat Protoc* **7**:1511-1522.
4. **Krogh A, Larsson B, von Heijne G, Sonnhammer EL.** 2001. Predicting transmembrane protein topology with a hidden Markov model: application to complete genomes. *J Mol Biol* **305**:567-580.
5. **Kelley LA, Mezulis S, Yates CM, Wass MN, Sternberg MJ.** 2015. The Phyre2 web portal for protein modeling, prediction and analysis. *Nat Protoc* **10**:845-858.
